# Supplementary material for: Engineering microdent structures of bone implant surfaces to enhance osteogenic activity in MSCs
Source: PubMed Central journal article supplement — Biochem Biophys Rep. 2016 Dec 10;9:100–5. doi: 10.1016/j.bbrep.2016.11.016 (PMC5632706; doi:10.1016/j.bbrep.2016.11.016), 2016-12-10
Supplement: mmc4.pdf [file mmc4.pdf]

One-way analysis of variance p-values for matrix calcification between surfaces

| Pattern | Control | A1    | A2    | A3    | A4    | B1    | B2    | B3    | B4    | C1    | C2    | C3    | C4    |
|---------|---------|-------|-------|-------|-------|-------|-------|-------|-------|-------|-------|-------|-------|
| Control | x       | 0.000 | 0.028 | 0.000 | 0.000 | 0.001 | 0.004 | -     | -     | -     | -     | -     | -     |
| A1      | 0.000   | x     | 0.011 | 0.002 | 0.000 | 0.001 | 0.000 | 0.000 | 0.000 | 0.004 | 0.000 | 0.000 | 0.000 |
| A2      | 0.028   | 0.011 | x     | -     | -     | -     | -     | -     | -     | -     | -     | 0.019 | 0.039 |
| A3      | 0.000   | 0.002 | -     | x     | -     | -     | 0.021 | 0.006 | 0.009 | -     | 0.004 | 0.003 | 0.000 |
| A4      | 0.000   | 0.000 | -     | -     | x     | -     | -     | 0.011 | 0.049 | -     | 0.005 | 0.001 | 0.001 |
| B1      | 0.001   | 0.001 | -     | -     | -     | x     | -     | 0.025 | -     | -     | 0.011 | 0.002 | 0.002 |
| B2      | 0.004   | 0.000 | -     | 0.021 | -     | -     | x     | 0.040 | -     | -     | 0.017 | 0.004 | 0.011 |
| B3      | -       | 0.000 | -     | 0.006 | 0.011 | 0.025 | 0.040 | x     | -     | -     | -     | -     | -     |
| B4      | -       | 0.000 | -     | 0.009 | 0.049 | -     | -     | -     | x     | -     | 0.044 | 0.015 | -     |
| C1      | -       | 0.004 | -     | -     | -     | -     | -     | -     | -     | x     | -     | 0.044 | -     |
| C2      | -       | 0.000 | -     | 0.004 | 0.005 | 0.011 | 0.017 | -     | 0.044 | -     | x     | -     | -     |
| C3      | -       | 0.000 | 0.019 | 0.003 | 0.001 | 0.002 | 0.004 | -     | 0.015 | 0.044 | -     | x     | 0.015 |
| C4      | -       | 0.000 | 0.039 | 0.000 | 0.001 | 0.002 | 0.011 | -     | -     | -     | -     | 0.015 | x     |

-
